# Supplementary material for: Fabrication of NiCo2S4/carbon-filled nickel foam complex as an advanced binder-free electrode for supercapacitors
Source: Royal Society of Chemistry journal article supplement (doi:10.1039/d0dt02160a), 2020-01-01
Supplement: d0dt02160a1.pdf [file d0dt02160a1.pdf]

## Fabrication of $\text{NiCo}_2\text{S}_4$ /carbide-filled-nickel-foam complex as advanced binder-free electrodes for supercapacitors

Shengjie Hui, Tao Ju, Xuemei Lin, Yuchun Li, Yuxuan Wang, Zongrong Ying\*

### Supporting Information

#### 1. Stability of carbide filling into NF

In order to verify the stability of carbide-filled NF in NF during the hydrothermal process, we conducted a hydrothermal experiment on carbide-filled NF under the same conditions in deionized water. The comparison of the SEM images before and after the reaction are presented in Fig. S1, which shows no significant structural changes.

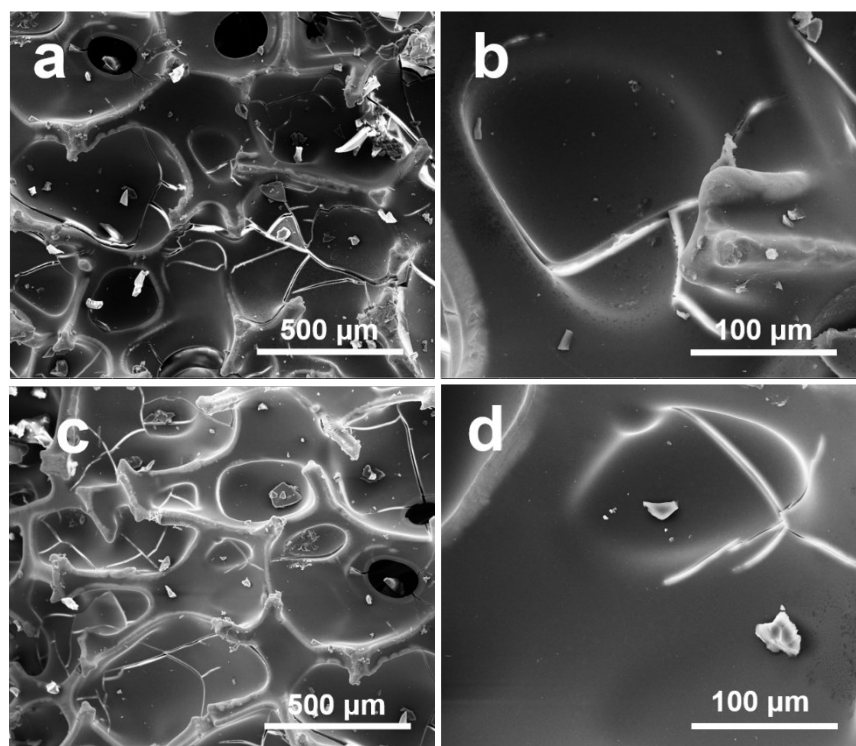

**Fig. S1** SEM images of Carbide-filled NF before (a, b) and after (c, d) the hydrothermal experiment.
